# Supplementary material for: Is Exposure Necessary? A Randomized Clinical Trial of Interpersonal Psychotherapy for PTSD
Source: Atypon-hosted journal article supplement (doi:10.1176/appi.ajp.2014.14070908), 2015-02-13
Supplement: appi.ajp.2014.14070908.ds001.pdf [file appi.ajp.2014.14070908.ds001.pdf]

 


Psychiatry Online
