# Supplementary figures and images for: Is Exposure Necessary? A Randomized Clinical Trial of Interpersonal Psychotherapy for PTSD
Source: Atypon-hosted journal article supplement (doi:10.1176/appi.ajp.2014.14070908), 2015-02-13

**FIGURE S1. Does IPT Work Through Exposure?**

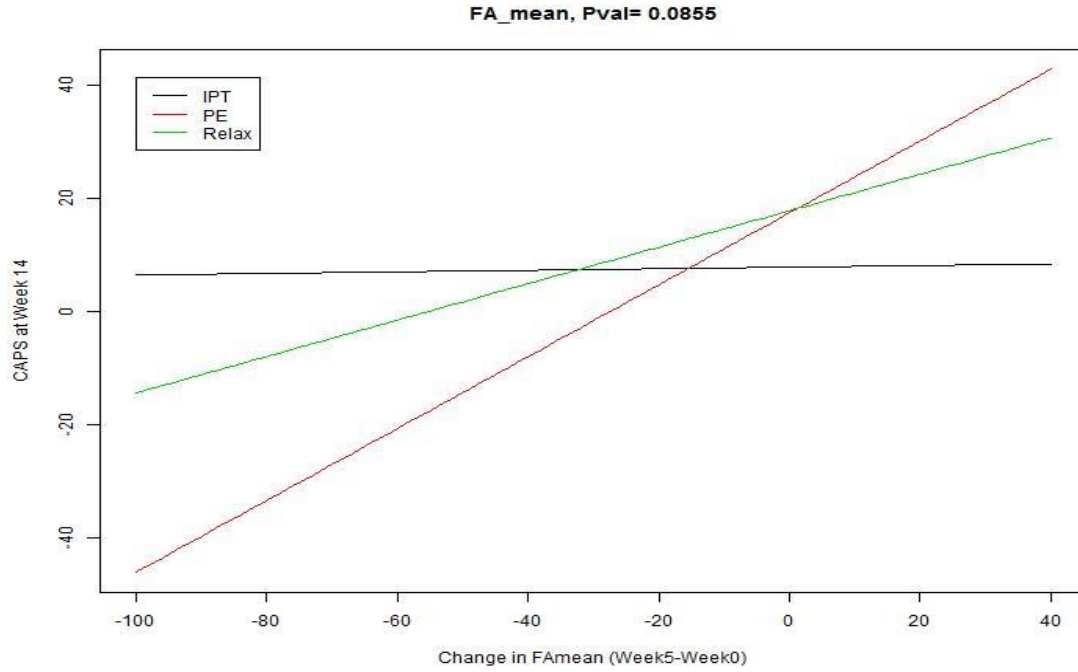

Supplement: appi.ajp.2014.14070908.ds001.pdf [file appi.ajp.2014.14070908.ds001.pdf]
